# Supplementary material for: Role of Dietary Nutrients in the Modulation of Gut Microbiota: A Narrative Review
Source: PubMed Central journal article supplement (PMC7071260; doi:10.3390/nu12020381), 2020-01-31
Supplement: nutrients-12-00381-s001.pdf [file nutrients-12-00381-s001.pdf]

**Supplementary Table S1.** Specific search terms (MeSH terms) for collecting research articles from 2005 to 2019.

| Micronutrients                                                                                                                                                                                                                           |                                                                                                                                              | Macronutrients                                                                                                                                                                              |                                                                                                           |                                                                                 |
|------------------------------------------------------------------------------------------------------------------------------------------------------------------------------------------------------------------------------------------|----------------------------------------------------------------------------------------------------------------------------------------------|---------------------------------------------------------------------------------------------------------------------------------------------------------------------------------------------|-----------------------------------------------------------------------------------------------------------|---------------------------------------------------------------------------------|
| Polyphenols                                                                                                                                                                                                                              | Vitamins, Minerals, and Trace elements                                                                                                       | Carbohydrates                                                                                                                                                                               | Fats                                                                                                      | Proteins                                                                        |
| Micronutrients, Polyphenols, Anthocyanine, Catechin, Caffeic acid, Chlorogenic Acid, Daidzein, Epicatechin, Genistein, Phloridzin, Quercetin, Epigallocatechin-3-gallate, Resveratrol, Fruit polyphenol, Tea polyphenol, Wine polyphenol | Micronutrients, Vitamin, Manganese, Cyanocobalamine, Tocopherol, Retinoic acid, Calcium, Magnesium, Iron, Phosphorus, Zinc, Selenium, Iodine | Macronutrients, Arabinoxylan, Chitosan, Galacto-Oligosaccharides, Inulin, Fructan, Lactose, Oligofructose, Resistant starch, High carbohydrate diet, Low carbohydrate diet, High fibre diet | Macronutrients, High fat diet, HFD, Flaxseed, Fish oil, Palm oil, Lard, Safflower oil, PUFA, Low fat diet | Macronutrient, High protein, Protein, Casein, Soybean, Crude protein, Mung bean |

The above MeSH terms were combined with the words below to narrow down the search:

AND Gut Microbiota AND/OR Human, Rat, in-vitro, NOT review.
